# Supplementary material for: A Widespread Distribution of Genomic CeMyoD Binding Sites Revealed and Cross Validated by ChIP-Chip and ChIP-Seq Techniques
Source: PLoS One. 2010 Dec 29;5(12):e15898. doi: 10.1371/journal.pone.0015898 (PMC3012110; doi:10.1371/journal.pone.0015898)
Supplement: Table S2 — Gene list calls for ChiP-chip, ChIP-seq, and the overlap of each method. (XLS) [file pone.0015898.s005.xls]

## Sheet: ChIP Gene Lists
ChIP-seq e-6 Gene List			ChIP-chip Gene List			Overlap of ChIP-seq and ChIP-chip
2L52.1			2L52.1			2L52.1
AC7.2A			AC3.3			B0035.1A
B0035.14			B0035.1A			B0041.5
B0035.1A			B0035.9			B0041.7
B0041.2B			B0041.1			B0238.10
B0041.3			B0041.4			B0273.4A
B0041.5			B0041.5			B0285.10
B0041.7			B0041.7			B0286.4A
B0041.8			B0238.10			B0304.1C
B0205.2			B0272.1			B0336.1
B0205.4			B0273.4A			B0336.2
B0212.T1			B0284.3			B0348.6C
B0228.4B			B0285.10			B0350.3
B0228.T1			B0286.4A			B0353.1
B0238.10			B0304.1C			B0393.3
B0250.4			B0336.1			B0403.4
B0250.7			B0336.2			B0457.1C
B0250.9			B0348.4B			B0464.5A
B0261.1			B0348.6C			B0513.1
B0261.4			B0350.3			B0513.3
B0273.4A			B0353.1			C01B10.5E
B0273.4B			B0379.4A			C01B7.3
B0280.15			B0393.3			C01C10.3
B0280.8			B0403.4			C01F6.6B
B0284.1			B0457.1C			C01G6.1A
B0285.1			B0464.5A			C01G6.4
B0285.10			B0513.1			C01G6.8B
B0285.7			B0513.3			C01G8.9A
B0285.T1			B0546.1			C02C6.1A
B0286.4A			BE10.3			C02F12.1
B0302.1C			C01A2.1			C02F12.4
B0303.2			C01B10.5E			C02F12.8
B0303.7			C01B4.7			C03A3.1
B0304.1C			C01B7.3			C03B8.1
B0304.4			C01B7.6			C03B8.3
B0310.1			C01C10.3			C04A11.4
B0334.12			C01F6.6B			C04A2.3A
B0334.5			C01G6.1A			C04A2.3C
B0336.1			C01G6.3			C04D8.1
B0336.10			C01G6.4			C04F6.6
B0336.11A			C01G6.8B			C05D10.1A
B0336.2			C01G8.9A			C05D11.7B
B0336.4			C02C6.1A			C05D9.3
B0336.5			C02F12.1			C05E11.1
B0344.2			C02F12.4			C05E4.14
B0348.6C			C02F12.8			C05E4.9A
B0350.2B			C03A3.1			C06A1.1
B0350.2C			C03A7.14			C06A6.2B
B0350.3			C03A7.7			C06C3.1B
B0350.T1			C03B8.1			C06E7.1C
B0353.1			C03B8.3			C06E7.4
B0365.3			C03B8.4			C06G1.4
B0379.4B			C04A11.3			C06G1.5
B0393.2			C04A11.4			C07A12.3
B0393.3			C04A2.3A			C07A12.5B
B0395.3			C04A2.3C			C07A9.3B
B0395.T1			C04D8.1			C07G1.3C
B0399.2			C04F6.6			C07H6.7
B0403.4			C05A9.2			C08B11.3
B0410.2B			C05D10.1A			C08C3.3
B0410.3			C05D11.7B			C08F1.6
B0412.5			C05D9.3			C08H9.2
B0414.7B			C05E11.1			C09D8.1B
B0416.1			C05E4.14			C09E7.7
B0416.6			C05E4.9A			C09G9.1
B0432.10			C06A1.1			C09H6.3
B0457.1C			C06A6.2B			C10E2.6
B0464.5A			C06C3.1B			C10H11.9
B0491.5			C06E7.1C			C11G6.1
B0495.9			C06E7.4			C12D8.1B
B0496.3A			C06G1.4			C14B1.1
B0507.1			C06G1.5			C14B9.6C
B0511.3			C07A12.1B			C14F5.1B
B0511.7			C07A12.3			C14F5.5
B0513.1			C07A12.5B			C15H9.6
B0513.3			C07A9.3B			C16A3.7
B0513.4			C07A9.9			C16B8.4
B0523.T1			C07D10.2B			C16H3.3A
B0545.3			C07G1.3C			C17E4.6
B0546.4A			C07G2.1B			C17G1.4
B0563.2			C07G2.3B			C17G1.7
B0563.4			C07H6.7			C17G10.4B
C01B10.5E			C07H6.9			C18B12.4
C01B12.2			C08B11.3			C18E3.4
C01B12.8			C08C3.3			C18F3.2
C01B7.3			C08F1.6			C18H2.1
C01C10.3			C08H9.2			C18H9.3
C01C4.3A			C09D8.1B			C24A8.3
C01F1.2			C09E7.7			C24F3.2
C01F1.3			C09G1.4			C25B8.1A
C01F6.5			C09G4.5B			C25H3.6B
C01F6.6B			C09G9.1			C26B9.6
C01G10.11B			C09H6.3			C26C6.1
C01G10.12			C10C6.7			C26C6.5A
C01G10.9			C10E2.6			C26D10.4
C01G6.1A			C10G11.7			C26G2.1
C01G6.4			C10H11.9			C27B7.4
C01G6.6B			C11G6.1			C27D6.4A
C01G6.8A			C12D8.1B			C30E1.T1
C01G6.8B			C13D9.2			C32A3.1B
C01G8.9A			C14A11.3A			C32D5.9
C02B10.4			C14B1.1			C33A11.2
C02B10.5			C14B9.6C			C33D9.5
C02B4.T2			C14C11.8			C34C12.8
C02B8.6			C14F5.1B			C34E11.1
C02C2.5			C14F5.5			C34F6.1
C02C6.1A			C15H9.6			C34F6.5
C02D4.2F			C16A3.5			C34H3.1
C02D4.T1			C16A3.7			C35C5.1
C02D5.2			C16B8.4			C35C5.3B
C02F12.1			C16H3.3A			C36F7.2
C02F12.4			C17E4.6			C37A2.2
C02F12.7			C17G1.4			C37A2.4A
C02F12.8			C17G1.7			C37E2.1
C02F12.T1			C17G10.4B			C38C3.5A
C02F4.2A			C18B12.4			C38H2.2
C02F4.3			C18E3.4			C39D10.3
C02F5.7B			C18E9.7			C39F7.2
C03A3.1			C18F3.2			C40A11.4
C03A3.T1			C18H2.1			C41C4.4
C03B1.12			C18H9.3			C41C4.6
C03B1.T1			C24A8.3			C43E11.3A
C03B8.1			C24D10.1			C43G2.1
C03B8.3			C24F3.2			C45B11.1B
C03C10.1			C24H10.5			C45B2.5
C03C10.3			C25A11.4B			C47E8.7
C03D6.4			C25B8.1A			C49A1.4
C03D6.6			C25F6.2A			C49H3.5A
C03F11.T1			C25H3.6B			C52B11.2
C03G5.1			C26B2.7			C52B9.3B
C03H5.3			C26B9.1A			C52B9.7A
C04A11.4			C26B9.6			C54D1.1
C04A11.T1			C26C6.1			C54D1.5
C04A2.1B			C26C6.2			C54H2.3
C04A2.3A			C26C6.5A			C54H2.5
C04A2.3C			C26D10.4			C56G2.1A
C04A2.7C			C26G2.1			C56G2.1B
C04A2.T1			C27A12.8			D1005.3
C04C11.T1			C27B7.4			D1025.8
C04D8.1			C27D6.4A			D1046.1
C04E7.T1			C28C12.5			D2021.8
C04F12.1			C29E6.7			D2024.3
C04F12.2			C29F9.12			D2045.1
C04F12.6			C30A5.4			D2092.5
C04F6.6			C30E1.T1			DY3.5
C04G6.1B			C30F8.4A			DY3.6
C04G6.2			C32A3.1A			E01G4.3
C04H5.6			C32A3.1B			E01G4.5
C05A9.3			C32D5.9			F01G10.8
C05C10.3			C32F10.6			F02E8.3
C05C10.6B			C33A11.2			F07A11.6B
C05C8.4			C33D9.5			F07A11.6D
C05C8.5			C33E10.1			F07C3.7
C05D10.1A			C34C12.8			F08B1.1B
C05D11.12			C34E11.1			F08C6.2
C05D11.13			C34F6.1			F08C6.4
C05D11.4			C34F6.5			F09A5.4C
C05D11.7B			C34H3.1			F09B9.2A
C05D2.6			C35C5.1			F09B9.3
C05D9.1			C35C5.3B			F09C8.2
C05D9.3			C35C5.4			F09E5.13
C05D9.5			C36E6.1B			F10D7.5A
C05D9.7			C36E8.5			F10E9.6B
C05E11.1			C36F7.2			F10E9.6C
C05E4.14			C37A2.2			F11C7.4
C05E4.3			C37A2.4A			F12F6.2
C05E4.9A			C37A2.5B			F12F6.5
C05G5.2			C37E2.1			F12F6.6
C05G5.4			C38C10.2			F13B10.2A
C05G6.T1			C38C3.5A			F13B12.6
C06A1.1			C38D4.4			F13B9.1B
C06A1.2			C38H2.2			F13B9.5
C06A12.3			C39D10.3			F13C5.2
C06A5.11			C39E6.1			F13D11.1
C06A5.7B			C39F7.2			F13D12.10
C06A6.2B			C40A11.4			F13D12.4B
C06B8.7			C40A11.6			F13D12.7
C06C3.1B			C40A11.9			F13E9.11
C06E7.1C			C41C4.4			F13G11.1B
C06E7.4			C41C4.6			F14D12.2
C06E8.3A			C41G11.3			F14F3.3
C06G1.4			C43D7.9			F14F4.3A
C06G1.5			C43E11.3A			F15C11.2A
C06G1.T1			C43G2.1			F15C11.2C
C06G3.1			C45B11.1B			F15G9.5
C06G3.10			C45B2.5			F16B12.6
C06G3.5A			C45B2.6			F16B4.8
C06G3.6			C46A5.1			F17E9.12
C06G3.7			C46C11.1			F18A1.6B
C06H2.5			C47B2.2B			F18A11.2
C07A12.3			C47D12.7			F18H3.3B
C07A12.4B			C47E12.4B			F19C6.1
C07A12.5B			C47E8.7			F20D1.3
C07A9.2			C48D1.2			F20D12.4
C07A9.3B			C49A1.4			F20D12.5
C07D10.1			C49H3.4			F22D3.2
C07D8.6			C49H3.5A			F22D3.4
C07F11.1			C49H3.5B			F22F1.1
C07G1.3C			C50F4.6			F22F1.T7
C07G2.3A			C52A10.3			F22F4.2
C07H6.1			C52B11.2			F22F7.1B
C07H6.3			C52B11.4			F25B5.4A
C07H6.5			C52B9.3B			F25B5.7A
C07H6.7			C52B9.7A			F25H2.4
C08B11.1			C52E12.1			F26A10.2
C08B11.3			C52E12.4			F26D12.1B
C08C3.3			C54D1.1			F26D12.1C
C08D8.1			C54D1.5			F26F4.4
C08F1.5			C54G4.7:YK713C3.MRNA			F26F4.8
C08F1.6			C54G7.2			F26G5.9
C08F1.9			C54G7.3A			F26H11.3B
C08G9.1			C54H2.3			F26H11.3C
C08H9.2			C54H2.5			F27D9.5
C09B7.2			C56G2.1A			F28B3.4
C09B8.4			C56G2.1B			F28C10.3
C09B8.6A			C56G3.2			F28D1.1
C09B8.6B			D1005.3			F28F9.1
C09B8.7A			D1025.8			F28H1.1
C09D1.1A			D1046.1			F31E3.2D
C09D4.5			D2021.1			F32A7.5C
C09D8.1A			D2021.8			F32E10.2
C09D8.1B			D2024.3			F33A8.3
C09E10.2A			D2045.1			F34H10.T1
C09E7.7			D2063.2			F35B3.5A
C09F9.1			D2092.5			F36H1.7
C09G4.2A			DY3.2			F37H8.1
C09G9.1			DY3.5			F37H8.5
C09G9.2			DY3.6			F38B7.1B
C09H10.3			E01G4.3			F38E9.5
C09H10.6			E01G4.5			F38H4.8
C09H10.9			F01D5.3			F39E9.5
C09H6.2B			F01F1.4			F39H12.1
C09H6.3			F01G10.8			F40E10.6
C10C5.1			F01G4.4			F40F4.7
C10C6.6			F02E11.3			F41A4.T1
C10E2.6			F02E8.3			F41G4.2B
C10F3.6			F02G3.1C			F42E11.2B
C10G11.8			F07A11.6B			F43G6.4
C10G11.9			F07A11.6D			F44A6.1B
C10G8.5D			F07B7.12			F44A6.2B
C10G8.6			F07B7.4			F45E4.2
C10G8.T1			F07C3.7			F45F2.4
C10H11.4			F07C6.4C			F46C3.1
C10H11.9			F07H5.8			F46F2.2A
C11G10.2			F08B1.1B			F46F3.4
C11G6.1			F08C6.2			F46F6.2
C11H1.3			F08C6.4			F46H5.2C
C11H1.7			F08F1.3			F46H5.3A
C11H1.8			F08F1.8			F47A4.2
C12C8.3A			F08G12.2			F47A4.3
C12D12.2A			F08H9.5			F47A4.5
C12D12.3			F09A5.4C			F47B10.1
C12D8.1B			F09A5.7			F47B10.9
C13B9.4			F09B9.2A			F47B7.1
C13C12.1			F09B9.3			F47D12.4C
C13F10.2			F09C8.2			F48A11.5
C14A11.6			F09E5.13			F48C1.4
C14B1.1			F09E5.15			F48F7.1
C14B4.1			F09F9.4			F48F7.4
C14B9.1			F10A3.5			F49E11.1A
C14B9.10			F10C2.8			F49E11.1B
C14B9.6C			F10D7.5A			F49E12.6
C14B9.T2			F10E7.1			F49E2.5E
C14C10.2			F10E9.6B			F49H12.1
C14C11.1			F10E9.6C			F49H12.6A
C14F11.1B			F10F2.2			F52C9.7
C14F5.1B			F10G7.4			F52D10.3A
C14F5.3A			F10G8.3			F52E10.1
C14F5.5			F11C7.4			F52E4.1A
C14H10.1			F11D5.3A			F52H2.T1
C14H10.2			F11D5.6			F53C3.6A
C15A11.5			F11E6.4			F53G12.5A
C15C6.T1			F12F6.2			F53H10.2
C15C7.2			F12F6.3			F54B11.3B
C15F1.4			F12F6.5			F54B3.3
C15F1.7			F12F6.6			F54C8.4
C15H11.7			F13B10.1B			F54D5.5
C15H11.9			F13B10.2A			F54E4.3
C15H9.6			F13B12.6			F54F2.6
C15H9.9			F13B9.1B			F54F2.8
C16A11.2			F13B9.5			F55C7.7A
C16A3.7			F13C5.2			F55C7.7C
C16B8.1			F13D11.1			F56A11.3
C16B8.4			F13D12.10			F56A8.3A
C16B8.T1			F13D12.4B			F56B6.4C
C16B8.T2			F13D12.7			F56C9.10A
C16C10.4			F13E6.1			F56D1.4C
C16C2.1			F13E6.6			F56F10.4
C16C2.3			F13E9.11			F56F3.1
C16C2.4			F13G11.1B			F57B9.2
C16C8.T1			F14D12.2			F57B9.7B
C16D9.2C			F14F3.1A			F57C7.1B
C16D9.5			F14F3.2			F57C7.3B
C16D9.6			F14F3.3			F57G12.1
C16H3.3A			F14F4.3A			F58A3.1A
C17B7.10			F14H12.4B			F58A3.1B
C17C3.16			F15B9.7			F58A4.7A
C17E4.10			F15C11.2A			F58H1.5
C17E4.2			F15C11.2C			F58H12.1
C17E4.3			F15E6.1			F59B10.1
C17E4.5			F15G9.5			F59E12.2
C17E4.6			F16A11.4			F59F4.2
C17F4.5			F16B12.6			F59F5.1
C17G1.4			F16B4.8			F59F5.6
C17G1.7			F16H11.3			GENENAME
C17G10.4B			F17C11.1			H01A20.1
C17H12.1			F17C11.9B			H13N06.3A
C17H12.14			F17E9.12			H13N06.5
C18A11.7B			F18A1.3C			H20J18.1B
C18A11.T2			F18A1.4A			H28G03.2A
C18A3.9			F18A1.6B			H43I07.3
C18B12.4			F18A11.2			K01A2.8A
C18B2.3			F18C5.10			K01A6.2
C18C4.10C			F18H3.3B			K01F9.1
C18D1.1			F18H3.5A			K01F9.4
C18D1.4			F19C6.1			K02A6.3A
C18D11.3			F19C6.2B			K02E10.8
C18D11.4			F19G12.7			K02G10.1
C18D4.6A			F20B10.1			K02G10.6A
C18E3.4			F20B10.2			K03A1.5
C18E3.5			F20D1.3			K04B12.2A
C18E9.1			F20D12.4			K04G11.1
C18E9.10			F20D12.5			K04H4.1B
C18E9.2			F20G2.2			K07B1.8
C18F3.2			F21A10.2A			K08A2.1
C18G1.1			F21C10.10			K08A2.4
C18H2.1			F21H11.3			K08B4.1B
C18H7.2B			F22B3.2			K08C7.3B
C18H9.3			F22D3.2			K08F8.1B
C23G10.8			F22D3.4			K08F8.1C
C24A11.2			F22D3.5			K08F8.6
C24A3.2A			F22D6.2			K08H2.8
C24A3.6			F22D6.3			K09A9.2
C24A8.3			F22F1.1			K09F5.4
C24F3.2			F22F1.T7			K10B3.10
C24H10.2			F22F4.2			K10B3.9
C24H12.5B			F22F7.1B			K11C4.3B
C25A1.10			F23F12.9A			K11D12.2
C25A1.4			F25B5.4A			K11D12.4
C25A1.7			F25B5.7A			K11D9.2B
C25B8.1A			F25D7.2			K11E8.1D
C25F6.T2			F25H2.4			M01D1.8
C25H3.6B			F25H2.5			M01D7.7A
C26B9.6			F25H2.8			M02A10.3A
C26C6.1			F26A10.2			M02D8.3
C26C6.4			F26D11.11			M03A1.1A
C26C6.5A			F26D12.1B			M03A8.2
C26C6.7			F26D12.1C			M03F4.7A
C26D10.3			F26E4.1			M04B2.1
C26D10.4			F26E4.8			M04C9.7
C26F1.5			F26F12.3A			M04G12.4A
C26G2.1			F26F4.4			M05D6.5
C27A12.5			F26F4.7			M106.4A
C27A12.6			F26F4.8			M117.2
C27A12.9			F26G5.9			M163.1
C27A12.T1			F26H11.3B			M163.3
C27A2.1			F26H11.3C			M163.4
C27A2.2B			F26H9.6			M163.T1
C27B7.4			F27D4.2			M79.1B
C27C12.4			F27D9.5			M88.6B
C27D6.4A			F28B3.4			R03E1.1
C27H5.1			F28B3.8			R03E9.1
C27H5.2D			F28C10.3			R03E9.2
C27H5.3			F28D1.1			R03G5.1C
C27H6.1			F28D1.8			R04E5.9
C28C12.7A			F28F5.1			R06A10.2
C28G1.T1			F28F9.1			R06F6.1
C28H8.9A			F28H1.1			R07B1.1
C29E4.12			F29C12.1			R07G3.7A
C29E4.4			F29F11.6			R08C7.2B
C29F3.1			F29G9.2B			R102.5B
C29F5.1			F30H5.3			R106.1
C29F7.T3			F31C3.1			R10E11.1A
C29F9.7			F31C3.7			R10E11.8
C29F9.8			F31D5.6			R10E4.2A
C30C11.2			F31E3.2D			R12B2.6
C30E1.T1			F32A11.3			R12E2.16
C30F8.4B			F32A7.5C			R13.1
C30G4.3			F32E10.2			R13A5.7
C30H7.2			F32E10.4			R13G10.1
C31E10.T1			F33A8.3			R144.1
C31H1.6B			F34D10.2			R144.2A
C31H1.7			F34D6.1			R144.7
C31H2.1B			F34H10.T1			R153.1D
C31H5.3			F35A5.3			R166.5A
C32A3.1B			F35B3.5A			R166.5B
C32D5.11			F35C8.6			R74.3
C32D5.5			F35C8.7A			R90.1
C32D5.9			F35E8.10			T01C8.1C
C32E12.4			F35E8.13			T01D1.2A
C32E8.2A			F36D4.5A			T01G9.2A
C33A11.2			F36H1.7			T01G9.3
C33A12.3			F36H5.8			T03G6.3
C33A12.4			F37H8.1			T04B8.2
C33D9.5			F37H8.5			T04C10.1
C33D9.8			F38B7.1B			T04C10.2A
C33F10.13			F38B7.3			T04C9.6
C33F10.5A			F38E9.5			T04D1.4
C33G3.1A			F38H4.8			T05A10.1B
C33G3.6			F39B2.10			T05A6.1
C33G3.T2			F39B2.3			T05A6.2B
C33H5.11			F39B2.6			T05A7.4
C33H5.12A			F39B3.2			T05E11.8
C33H5.18B			F39E9.5			T05G5.1
C34B4.2			F39F10.3			T07D1.2
C34C12.2			F39H12.1			T07D1.4
C34C12.5			F40B5.2A			T08A9.1
C34C12.8			F40E10.6			T08H10.1
C34C6.7			F40F11.3			T08H4.3B
C34D10.1			F40F4.3			T09A12.4B
C34D10.2			F40F4.7			T09B4.8
C34D4.5			F40F9.7A			T09E8.1C
C34E10.6			F40G9.6			T09E8.1D
C34E11.1			F41A4.T1			T10B10.3
C34F11.9C			F41E6.4B			T10C6.12
C34F6.1			F41E6.6			T10H10.3
C34F6.4			F41G4.2B			T12A7.1
C34F6.5			F42A6.7B			T12B3.4
C34G6.6A			F42E11.2B			T12D8.1
C34H3.1			F42G10.1			T12F5.4
C35A5.8			F43C9.4B			T12F5.5A
C35B1.2A			F43G6.4			T13F2.8
C35B8.2			F43G9.10			T13G4.4
C35C5.1			F43G9.11			T13H2.4A
C35C5.3B			F44A6.1B			T13H2.5
C35C5.5			F44A6.2B			T14A8.1
C35C5.6			F44E5.4			T14F9.4B
C35E7.7			F45C12.5			T14G10.4
C36A4.8			F45E1.2			T15H9.1
C36B1.12			F45E4.2			T16H12.5
C36B1.1B			F45E6.6			T18D3.9
C36B1.8A			F45F2.4			T19B4.7
C36B7.6			F46C3.1			T19E7.2C
C36E6.1A			F46C5.2			T20B12.6A
C36E6.2			F46F2.2A			T20B5.1
C36E6.3			F46F3.1			T21B4.4
C36E6.5			F46F3.4			T21B6.3
C36E8.1			F46F6.2			T21H8.5
C36E8.2			F46H5.2B			T22B2.4
C36F7.1			F46H5.2C			T22C1.7
C36F7.2			F46H5.3A			T23C6.4
C37A2.2			F46H5.6			T23E7.2E
C37A2.4A			F46H6.2C			T23G5.6
C37A5.1			F47A4.2			T24A11.1A
C37A5.9			F47A4.3			T24B8.2
C37C3.9			F47A4.5			T24B8.3A
C37E2.1			F47B10.1			T24B8.4
C37F5.1			F47B10.9			T24C4.2
C37H5.5			F47B7.1			T24C4.6B
C38C3.4A			F47D12.4C			T24D8.7
C38C3.5A			F47E1.4			T24F1.3
C38C6.2			F47F6.1			T25G12.5
C38D4.5			F48A11.5			T26A5.9
C38H2.2			F48C1.4			T26A8.1
C39D10.3			F48E3.6			T26C12.3
C39E9.12			F48F7.1			T27E9.3
C39E9.14B			F48F7.4			T28A11.15
C39F7.2			F49B2.3			T28B11.1
C40A11.4			F49E10.5			T28D6.2
C40C9.1			F49E11.1A			T28F12.2C
C40H1.3			F49E11.1B			T28F12.2E
C40H5.T1			F49E12.6			T28F12.3
C41A3.1			F49E2.5E			W01A11.3
C41C4.2			F49E8.1			W01D2.3
C41C4.4			F49H12.1			W02B12.2
C41C4.5			F49H12.6A			W02C12.3D
C41C4.6			F52B10.1			W03F8.5
C41C4.9			F52C9.7			W03F9.5
C41D11.3			F52C9.8E			W05H7.4B
C41D11.5			F52D10.3A			W05H9.3
C41G7.7			F52E10.1			W06A7.3B
C41H7.3			F52E4.1A			W06B11.2
C42C1.2			F52E4.6			W06F12.1A
C42D8.T1			F52E4.8			W06F12.1C
C43E11.3A			F52F12.6			W06H8.6
C43E11.8			F52H2.T1			W07B3.2C
C43G2.1			F53B2.6			W08A12.1C
C43G2.3			F53B3.5			W08A12.2
C43H6.7			F53B7.5			W08E12.7
C44B12.2			F53C11.5			W09B6.4
C44B12.3			F53C3.6A			W10C8.2
C44B7.10			F53F10.5			W10D5.3A
C44B7.12			F53G12.5A			Y102A11A.1
C44B7.4			F53H10.2			Y102A11A.8
C44B7.T1			F54B11.3B			Y105C5A.14
C44B9.1			F54B3.3			Y110A7A.3
C44C10.4			F54C8.4			Y110A7A.7
C44C10.8			F54D5.5			Y111B2A.11
C44C11.1A			F54E12.3			Y111B2A.12
C44C8.6A			F54E4.3			Y116A8B.1
C44E12.3C			F54E7.6			Y11D7A.12
C44E4.2			F54F2.2A			Y11D7A.13
C44F1.5			F54F2.6			Y17G9B.5
C44H4.7B			F54F2.8			Y24D9A.7
C45B11.1B			F54F3.1			Y37A1B.16
C45B2.5			F55B12.3B			Y37A1B.1B
C45E1.1			F55C7.7A			Y37E11AR.6
C45E5.6B			F55C7.7C			Y38C1AA.4
C45G3.4			F55F1.3			Y38C9A.2
C45G9.2			F55G1.3			Y38F1A.5
C46C11.3			F56A11.3			Y39A1A.15C
C46C2.2			F56A11.7			Y39A1A.15D
C46F11.1			F56A8.3A			Y39B6A.43B
C46F11.2A			F56B6.4C			Y39E4B.6
C46F11.4			F56C9.10A			Y39G10AR.10
C46F4.2			F56D1.4C			Y39G10AR.11
C46G7.2			F56E3.4			Y42H9AR.4
C47D12.2			F56F10.4			Y43C5A.5
C47E12.8			F56F3.1			Y43C5A.6A
C47E8.3			F56H9.2			Y47A7.1
C47E8.5			F57B9.2			Y47D3A.1
C47E8.7			F57B9.7B			Y47D3A.16
C47G2.2			F57B9.9			Y48B6A.14
C47G2.4			F57C7.1B			Y48C3A.5B
C48A7.1B			F57C7.3B			Y49E10.19
C48A7.2			F57C7.4			Y50D7A.8
C48B6.2			F57F4.3			Y54G2A.26B
C48C5.T6			F57F4.4			Y55D9A.1B
C48D5.2B			F57G12.1			Y56A3A.1
C48D5.3			F58A3.1A			Y56A3A.7
C48E7.6			F58A3.1B			Y57G11C.10
C48E7.8			F58A4.7A			Y57G11C.15
C48G7.1			F58D2.1			Y65A5A.T1
C49A1.3			F58D2.2			Y65A5A.T4
C49A1.4			F58D5.T1			Y65B4BL.5
C49A1.5			F58H1.5			Y65B4BR.4B
C49C3.15			F58H12.1			Y65B4BR.5A
C49C3.8			F59B10.1			Y66A7A.3
C49F5.6			F59B2.3			Y67D8A.4
C49G7.9			F59C6.6			Y67D8C.4
C49H3.11			F59D12.4			Y69A2AR.31
C49H3.5A			F59E12.2			Y70C5C.2
C49H3.6B			F59F3.1			Y71F9AL.9
C49H3.9			F59F4.2			Y71F9B.5B
C50C3.6			F59F5.1			Y71G12A.3
C50C3.9			F59F5.6			Y71G12B.11B
C50E3.6			GENENAME			Y73B3A.1
C50F2.4			H01A20.1			Y73B6BL.6
C50F2.6B			H02I12.6			Y73C8B.4
C50F4.11			H13N06.3A			Y73F4A.1
C50F4.16			H13N06.5			Y73F8A.26
C50F4.7			H15N14.1D			Y7A9D.T1
C50F7.6			H20J18.1B			Y7A9D.T3
C50H11.17			H28G03.2A			ZC168.3
C50H2.5			H43I07.3			ZC416.1
C51E3.10			K01A2.8A			ZC506.1
C51E3.8			K01A6.2			ZC64.3B
C51F7.1			K01F9.1			ZC84.3
C52B11.2			K01F9.4			ZK1058.4
C52B9.3B			K02A6.3A			ZK1098.1
C52B9.6			K02B2.6			ZK1098.10B
C52B9.7A			K02E10.1			ZK112.4
C52E12.3			K02E10.8			ZK1236.2
C52E12.6			K02G10.1			ZK1236.3
C52E4.2			K02G10.6A			ZK154.5
C52E4.3			K02H8.1			ZK287.8
C52E4.6A			K03A1.5			ZK377.2A
C53A5.2			K03A1.6			ZK470.2A
C53B4.4C			K04B12.2A			ZK484.4A
C53B4.7A			K04D7.4			ZK507.6
C53B7.4			K04G11.1			ZK512.1
C53C7.T1			K04G2.7			ZK593.4
C53D5.1B			K04H4.1B			ZK593.6
C53D5.1C			K04H4.2B			ZK662.4
C53D5.4			K05C4.8			ZK682.2
C53D5.6			K06A5.4			ZK742.2
C53D6.6			K06C4.3			ZK792.6
C53H9.2A			K06C4.5			ZK867.1D
C54C8.4			K07A1.12			ZK899.8F
C54D1.1			K07B1.6B
C54D1.5			K07B1.8
C54D1.7			K07C5.3
C54D2.4			K07F5.11
C54E10.4			K07G5.1
C54E4.2B			K07G5.6
C54F6.5			K08A2.1
C54G10.2			K08A2.4
C54G10.3			K08B4.1B
C54G4.1			K08C7.3B
C54G4.3			K08D12.6
C54H2.1			K08E3.4
C54H2.3			K08E3.5B
C54H2.5			K08E3.6
C55A6.1			K08F8.1B
C55A6.10			K08F8.1C
C55A6.8			K08F8.5A
C55B7.4B			K08F8.6
C55C2.5A			K08H2.8
C56A3.1			K09A9.2
C56A3.6			K09F5.4
C56C10.8			K09H11.7
C56C10.9			K10B3.10
C56E6.2			K10B3.5
C56E6.6			K10B3.9
C56G2.1A			K10C2.1
C56G2.1B			K10C3.2
C56G2.9			K10C3.6D
C56G7.3			K11C4.3B
CC4.2			K11D12.2
CC8.2A			K11D12.4
CD4.5			K11D9.2B
D1005.2			K11E4.5
D1005.3			K11E8.1D
D1007.12			K11G9.4
D1007.14			K12C11.1
D1007.15			M01D1.10
D1009.2A			M01D1.8
D1022.1			M01D7.7A
D1025.8			M02A10.3A
D1046.1			M02D8.3
D1054.14			M02G9.1
D1086.2			M03A1.1A
D2007.5			M03A8.2
D2021.8			M03B6.4
D2023.2			M03F4.2A
D2024.3			M03F4.7A
D2024.6			M04B2.1
D2024.7			M04C9.7
D2030.6			M04G12.4A
D2045.1			M05D6.5
D2045.6			M106.4A
D2045.9			M117.2
D2063.1			M117.5
D2089.1B			M163.1
D2092.5			M163.2
D2096.7			M163.3
DH11.2			M163.4
DY3.5			M163.T1
DY3.6			M199.5
E01A2.4			M60.4A
E01A2.5			M7.1
E01A2.6			M79.1B
E01G4.1			M88.5
E01G4.2			M88.6B
E01G4.3			R02D5.1
E01G4.4			R02F2.1B
E01G4.5			R03E1.1
E02H1.7			R03E1.2
E02H4.3A			R03E1.3
E02H4.3B			R03E9.1
E02H9.6			R03E9.2
E03E2.T1			R03G5.1C
E04A4.6			R04E5.9
E04A4.7			R05D3.7
E04F6.10			R06A10.2
E04F6.2			R06F6.1
EEED8.15			R07B1.1
EEED8.2			R07B7.3
EEED8.5			R07E3.6
EEED8.8			R07G3.7A
EGAP1.2			R07H5.2
EGAP2.2			R08C7.11
F01D5.6			R08C7.2B
F01F1.3			R08D7.6A
F01F1.8A			R08E3.4
F01G10.7			R09A8.3
F01G10.8			R09B5.5
F01G12.2A			R09F10.2
F01G12.2B			R102.5B
F01G12.5A			R106.1
F01G12.6			R107.6
F01G4.6			R107.8
F02A9.2			R10E11.1A
F02D10.T2			R10E11.8
F02E8.1			R10E4.2A
F02E8.3			R119.4
F02E9.2B			R11A5.4D
F02E9.4			R11A8.7B
F02H6.5			R12B2.5A
F07A11.4			R12B2.6
F07A11.6B			R12E2.16
F07A11.6D			R12H7.3
F07A5.6			R13.1
F07A5.7			R13A5.7
F07C3.4			R13G10.1
F07C3.7			R13H4.4
F07C6.4A			R13H8.1A
F07D10.1			R144.1
F07H5.13			R144.2A
F07H5.2			R144.7
F08A8.5			R153.1D
F08B1.1B			R166.5A
F08B1.1C			R166.5B
F08B4.7			R53.2
F08B6.1			R74.3
F08B6.3			R90.1
F08B6.4B			T01C8.1C
F08C6.2			T01D1.2A
F08C6.4			T01D1.6
F08C6.7			T01G9.2A
F08D12.1			T01G9.3
F08D12.7			T02C5.3
F08F1.7			T03G6.3
F08F3.10			T04B8.2
F08G12.3			T04C10.1
F08G2.5			T04C10.2A
F08G2.7			T04C4.1B
F08G5.3A			T04C9.6
F09A5.4C			T04D1.4
F09A5.8			T04F8.1
F09B12.2			T04F8.9
F09B9.2A			T05A10.1B
F09B9.3			T05A10.1C
F09B9.4			T05A6.1
F09C8.2			T05A6.2B
F09D1.1			T05A7.4
F09E10.3			T05B4.11
F09E10.8A			T05B4.13
F09E5.11			T05B4.3
F09E5.13			T05B4.8
F09E5.9			T05C12.10
F09E8.7			T05D4.2
F09F7.1			T05E11.8
F09F7.2A			T05G5.1
F09F7.5B			T07A9.1
F09F7.6			T07C5.1B
F09F7.7A			T07D1.2
F09G2.8			T07D1.4
F09G8.7			T08A9.1
F10A3.6			T08E11.5
F10B5.8			T08H10.1
F10D11.6			T08H4.3B
F10D2.9			T09A12.4A
F10D7.5A			T09A12.4B
F10E7.4			T09B4.3
F10E7.8			T09B4.5A
F10E9.3			T09B4.8
F10E9.6A			T09B9.4
F10E9.6B			T09E8.1B
F10E9.6C			T09E8.1C
F10G2.3			T09E8.1D
F10G7.10B			T09E8.1E
F10G7.3			T10A3.1A
F10G7.8			T10B10.3
F10G8.7			T10C6.12
F10G8.8			T10E10.4
F11A10.4			T10H10.3
F11A10.5			T12A7.1
F11A10.7			T12B3.4
F11C1.6A			T12D8.1
F11C3.3			T12F5.4
F11C7.3B			T12F5.5A
F11C7.4			T12F5.5B
F11D5.1B			T13A10.2
F11D5.3B			T13F2.3A
F11E6.1C			T13F2.8
F11G11.7			T13G4.4
F11H8.1			T13H2.3
F11H8.T1			T13H2.4A
F12E12.1			T13H2.5
F12F3.2A			T14A8.1
F12F6.2			T14F9.4B
F12F6.5			T14G10.4
F12F6.6			T14G12.4B
F12F6.9			T14G8.1
F13A7.13			T15H9.1
F13B10.2A			T16H12.5
F13B12.6			T18D3.9
F13B9.1B			T19B4.2
F13B9.5			T19B4.7
F13C5.1			T19D12.1
F13C5.2			T19E7.2C
F13C5.6A			T20B12.6A
F13D11.1			T20B5.1
F13D11.2			T20G5.7
F13D11.3			T21B4.4
F13D11.4			T21B6.1
F13D12.10			T21B6.3
F13D12.2			T21G5.5B
F13D12.4B			T21H8.5
F13D12.6			T22B2.4
F13D12.7			T22C1.1
F13E6.5			T22C1.11
F13E9.11			T22C1.7
F13G11.1B			T22D1.9
F13G11.T1			T23B12.7
F13G3.11			T23C6.3
F13G3.12			T23C6.4
F13G3.9			T23D8.5
F13H8.7			T23D8.9A
F14B8.1A			T23E7.2E
F14B8.2			T23F1.6
F14B8.T1			T23G5.6
F14D12.2			T24A11.1A
F14D12.4A			T24B8.2
F14F3.3			T24B8.3A
F14F4.3A			T24B8.4
F14F8.10			T24C4.2
F15A8.6			T24C4.6B
F15B10.3			T24D8.7
F15B9.2			T24F1.3
F15B9.5			T24H7.5C
F15C11.2A			T25B9.3
F15C11.2C			T25D10.4
F15D3.1A			T25G12.5
F15D3.4			T25G12.8
F15G9.5			T26A5.9
F15G9.T1			T26A8.1
F15H9.1			T26C12.3
F16B12.6			T27E4.8
F16B4.8			T27E9.3
F17C11.10			T27F7.2B
F17C11.11			T27F7.2C
F17C11.12			T28A11.15
F17C11.3			T28B11.1
F17C11.7			T28B8.1
F17C8.1			T28D6.2
F17C8.3			T28D9.1
F17E5.1A			T28F12.2C
F17E5.2			T28F12.2E
F17E9.12			T28F12.3
F17H10.T1			T28F4.1
F18A1.6B			T28F4.4
F18A11.2			T28F4.6
F18E9.5B			T28H11.1
F18G5.6			T28H11.5
F18H3.1			VW02B12L.3
F18H3.3B			W01A11.3
F18H3.4			W01C8.5
F19B10.1			W01D2.3
F19B10.4			W01H2.2
F19C6.1			W02B12.2
F19C6.4			W02C12.1
F19C7.3			W02C12.3D
F19F10.11A			W02D3.9
F19H6.6			W03A5.4
F19H6.T1			W03F8.5
F20B6.2			W03F9.5
F20B6.7			W04A8.4
F20C5.2B			W05B5.3
F20D1.10			W05H7.4B
F20D1.3			W05H9.3
F20D12.2			W06A7.3B
F20D12.4			W06B11.2
F20D12.5			W06F12.1A
F20D6.10			W06F12.1C
F20G2.1			W06H8.1F
F20G4.1			W06H8.6
F20G4.3			W07B3.2C
F20H11.3			W07E11.1
F21A10.2B			W07G4.4
F21C10.8B			W08A12.1C
F21D12.3			W08A12.2
F21D5.4			W08E12.7
F21E9.4			W09B6.4
F21F12.1			W09C3.4
F21G4.4			W09C5.2
F21H11.2A			W09C5.8
F21H7.1			W10C8.2
F22A3.2			W10D5.3A
F22A3.3			Y102A11A.1
F22B3.1			Y102A11A.8
F22B5.2			Y105C5A.14
F22B5.6			Y105C5A.3
F22B7.10			Y105C5A.4
F22B7.7			Y105C5A.6
F22B7.T5			Y110A7A.3
F22D3.2			Y110A7A.7
F22D3.4			Y111B2A.11
F22D3.6			Y111B2A.12
F22D6.1			Y116A8B.1
F22E12.2			Y11D7A.12
F22E12.4B			Y11D7A.13
F22E5.3			Y15E3A.1
F22F1.1			Y15E3A.5
F22F1.T6			Y17G7A.1
F22F1.T7			Y17G9B.5
F22F4.2			Y18D10A.13
F22F4.3			Y18D10A.4
F22F7.1B			Y19D10A.4
F22F7.7			Y24D9A.7
F23A7.T1			Y25C1A.3
F23B12.8			Y34B4A.2
F23D12.5			Y37A1B.16
F23D12.7			Y37A1B.1B
F25B3.6			Y37E11AR.4
F25B4.5			Y37E11AR.6
F25B5.3A			Y37E11C.1C
F25B5.4A			Y38A10A.5
F25B5.7A			Y38C1AA.4
F25D1.1B			Y38C9A.2
F25D7.5			Y38F1A.5
F25E2.3			Y38H8A.7
F25E2.5B			Y39A1A.15C
F25F1.2			Y39A1A.15D
F25F2.2			Y39B6A.43B
F25G6.5			Y39D8B.1
F25H2.13			Y39E4B.6
F25H2.3			Y39G10AR.10
F25H2.4			Y39G10AR.11
F25H2.6			Y39G10AR.12A
F25H2.7			Y39G8B.4
F25H5.1A			Y39H10A.6
F25H5.2			Y40H7A.7
F25H5.6			Y41D4A.6
F25H5.7			Y42G9A.4
F26A10.2			Y42H9AR.4
F26A3.8			Y42H9B.2
F26B1.1			Y43B11AL.1
F26B1.5B			Y43C5A.5
F26C11.1			Y43C5A.6A
F26D10.3			Y45G5AM.1B
F26D10.9			Y46C8AL.6
F26D12.1A			Y46H3D.8
F26D12.1B			Y47A7.1
F26D12.1C			Y47D3A.1
F26E4.10			Y47D3A.16
F26E4.12			Y48B6A.14
F26F12.3B			Y48C3A.5B
F26F4.11			Y49E10.19
F26F4.4			Y49E10.23A
F26F4.8			Y49E10.6
F26G5.9			Y49F6A.3
F26H11.2A			Y50D4A.2
F26H11.3B			Y50D7A.8
F26H11.3C			Y51H4A.12
F26H11.4			Y51H7BR.2
F26H9.2			Y53C12B.3A
F26H9.3			Y54E10A.16A
F27C1.4			Y54E5B.1B
F27C1.7B			Y54G2A.26A
F27D4.1			Y54G2A.26B
F27D9.3			Y54G2A.27
F27D9.5			Y55D9A.1B
F27D9.T1			Y55F3C.2
F28A10.6			Y56A3A.1
F28B12.2A			Y56A3A.27
F28B3.2			Y56A3A.4
F28B3.3			Y56A3A.6
F28B3.4			Y56A3A.7
F28B3.5B			Y57G11C.10
F28B3.6A			Y57G11C.15
F28B4.2			Y57G7A.8
F28C1.2			Y5H2A.3
F28C10.3			Y62F5A.2
F28C6.3			Y65A5A.2
F28D1.1			Y65A5A.T1
F28D1.10			Y65A5A.T4
F28D1.11			Y65B4BL.1
F28D9.1			Y65B4BL.5
F28E10.1D			Y65B4BR.4B
F28F5.6			Y65B4BR.5A
F28F8.1			Y65B4BR.8
F28F8.T4			Y66A7A.3
F28F9.1			Y66D12A.12
F28H1.1			Y67D8A.4
F28H1.2			Y67D8C.4
F28H1.3			Y67H2A.1
F28H1.4			Y67H2A.10
F28H6.4			Y69A2AR.31
F28H6.T1			Y6E2A.8
F29B9.2B			Y70C5C.2
F29B9.8			Y71F9AL.7
F29C4.T1			Y71F9AL.9
F29G9.2A			Y71F9B.5B
F29G9.4			Y71G12A.3
F29G9.5			Y71G12B.11B
F29G9.6			Y73B3A.1
F30A10.10			Y73B3A.5
F30A10.3			Y73B6BL.13
F30H5.1			Y73B6BL.32
F30H5.4			Y73B6BL.6
F31A3.5			Y73C8B.4
F31B12.T1			Y73F4A.1
F31D4.4			Y73F8A.26
F31E3.2D			Y73F8A.9
F31E3.3			Y76A2B.2
F31E8.1			Y77E11A.15
F31E8.6			Y79H2A.1
F32A6.4A			Y7A9D.T1
F32A6.T1			Y7A9D.T3
F32A7.2			Y82E9BR.17A
F32A7.3A			Y97E10AR.1
F32A7.4			Y97E10C.1
F32A7.5C			ZC132.T1
F32A7.6			ZC155.7
F32A7.7			ZC168.3
F32B5.7			ZC416.1
F32D1.10			ZC443.3
F32D8.12A			ZC443.4
F32D8.14			ZC477.1
F32E10.1B			ZC506.1
F32E10.2			ZC64.3B
F32H2.1A			ZC8.4A
F33A8.1			ZC84.3
F33A8.3			ZK1058.4
F33C8.3			ZK1067.7
F33C8.4			ZK1098.1
F33D11.5			ZK1098.10B
F33D11.9B			ZK112.1
F33E2.2A			ZK112.2
F33E2.7			ZK112.3
F33G12.T1			ZK112.4
F33H1.1B			ZK112.7
F33H1.4			ZK1151.1B
F34D10.4			ZK1236.2
F34D6.3			ZK1236.3
F34H10.T1			ZK1307.6
F35A5.1			ZK131.4
F35B12.3			ZK154.5
F35B3.5A			ZK180.5C
F35B3.7			ZK180.6
F35D6.1A			ZK218.13
F35F10.11			ZK287.8
F35F10.12			ZK377.2A
F35G12.2			ZK381.5A
F35G12.3A			ZK470.2A
F35G12.7			ZK484.4A
F35G2.2			ZK507.6
F35G2.4			ZK512.1
F35G2.5			ZK546.14B
F35H12.3			ZK593.4
F35H8.T1			ZK593.6
F36A2.2			ZK632.7
F36A2.8			ZK662.3B
F36D1.2			ZK662.4
F36D1.6			ZK682.2
F36D3.6			ZK682.4
F36D4.5B			ZK742.2
F36F2.3			ZK783.4
F36F2.4			ZK792.6
F36H1.1			ZK795.1
F36H1.2			ZK863.6
F36H1.7			ZK867.1D
F36H1.8			ZK899.8D
F36H2.1A			ZK899.8F
F36H2.3B			ZK909.1
F37A8.1			ZK909.2C
F37C12.11			ZK930.10
F37H8.1			ZK930.8
F37H8.5			ZK938.2
F38A5.2A			ZK973.9
F38A5.7
F38A6.2
F38A6.3B
F38A6.3D
F38A6.4
F38B7.1A
F38B7.1B
F38E1.7
F38E11.10
F38E11.5
F38E11.7
F38E9.2
F38E9.5
F38G1.T2
F38H4.10
F38H4.7
F38H4.8
F39B1.1
F39B2.4B
F39C12.1
F39E9.5
F39E9.6
F39E9.7
F39F10.4
F39G3.2
F39G3.3
F39G3.8
F39H12.1
F40E10.3
F40E10.6
F40F11.1
F40F11.2
F40F4.7
F40F8.10
F40F9.10
F40F9.5
F40F9.6A
F40H3.1
F40H3.3
F41A4.T1
F41B4.1
F41C6.1
F41D9.3A
F41D9.T1
F41D9.T3
F41E6.12
F41E6.5
F41G4.2B
F41H10.3B
F42A10.3
F42A10.4B
F42A10.T2
F42A6.7A
F42A9.1B
F42A9.2
F42C5.8
F42D1.T1
F42E11.2B
F42E11.4
F42G10.2
F42G4.3B
F42G8.12
F42G8.8
F42G9.2
F42H10.6
F43C1.2B
F43C11.9
F43C9.2
F43C9.T1
F43D2.4
F43D9.3
F43D9.5
F43E2.4
F43E2.5
F43E2.7A
F43E2.9
F43G6.1A
F43G6.4
F43G6.8
F43G9.1
F44A2.5A
F44A6.1B
F44A6.2B
F44B9.2
F44B9.6
F44E2.3
F44E2.7C
F44E2.9
F44E5.2
F44E5.5
F44E7.4C
F44E7.8
F44G4.4A
F44G4.8
F45C12.13
F45D11.10
F45E10.1A
F45E12.3
F45E4.2
F45E6.2
F45F2.4
F45H10.5
F45H11.4
F46A9.3
F46A9.6
F46B6.6
F46C3.1
F46C5.6
F46C8.3
F46E10.9
F46F11.5
F46F2.2A
F46F3.4
F46F6.1A
F46F6.2
F46G10.5
F46G10.7B
F46G11.3
F46G11.T1
F46H5.2C
F46H5.3A
F46H5.4
F47A4.2
F47A4.3
F47A4.5
F47A4.T1
F47B10.1
F47B10.9
F47B3.4
F47B7.1
F47B8.11
F47D12.4C
F47D12.6
F47D12.9A
F47F2.1C
F47F6.2
F47G6.1
F47G6.2
F47G6.T1
F47G9.2
F47G9.4
F48A11.5
F48C1.4
F48D6.4C
F48E3.1A
F48E3.3
F48E8.5
F48F5.4
F48F5.6
F48F7.1
F48F7.4
F48F7.5
F48F7.6
F49B2.1
F49C12.9
F49D11.2
F49E11.1A
F49E11.1B
F49E12.6
F49E2.5E
F49H12.1
F49H12.6A
F52B5.1
F52B5.3
F52B5.5
F52C9.7
F52D10.3A
F52D2.7
F52E1.13C
F52E10.1
F52E4.1A
F52E4.1B
F52E4.7
F52F12.1A
F52F12.2
F52F12.7
F52G2.1A
F52G2.2
F52H2.5
F52H2.T1
F52H2.T2
F52H3.2
F52H3.4
F53A10.2A
F53A3.1
F53A3.2
F53A3.4
F53A9.10A
F53B8.1
F53C11.4
F53C11.7
F53C11.8
F53C3.6A
F53E4.1
F53F10.1
F53F10.4
F53F8.6
F53G12.10
F53G12.5A
F53G2.1
F53G2.4B
F53H1.4C
F53H10.2
F53H2.3
F53H8.4
F54B11.3B
F54B11.6
F54B11.8
F54B3.3
F54C1.6
F54C1.7
F54C4.3
F54C4.4
F54C8.4
F54C8.9
F54C9.1
F54C9.5
F54D10.3
F54D10.5
F54D11.3
F54D12.6
F54D12.7
F54D5.1
F54D5.15
F54D5.4
F54D5.5
F54D5.7
F54D5.8
F54D7.2
F54D7.4
F54D8.2
F54E2.1
F54E2.3D
F54E4.3
F54E7.8
F54F2.2C
F54F2.6
F54F2.8
F54G8.4
F54H12.6
F55A11.6
F55A12.3
F55A4.5
F55A8.2B
F55A8.2C
F55B12.2
F55C12.5B
F55C5.3
F55C5.7
F55C7.7A
F55C7.7C
F55D10.3
F55G1.10
F55G1.11
F55H12.4
F55H2.2
F56A11.3
F56A3.1
F56A3.3B
F56A3.5
F56A6.2
F56A8.3A
F56A8.3B
F56A8.6
F56A8.7B
F56B6.2A
F56B6.4C
F56B6.6
F56C3.T1
F56C9.1
F56C9.10A
F56D1.4C
F56D12.5A
F56D12.6A
F56D2.1
F56E10.1
F56F10.4
F56F3.1
F56F3.T1
F56F4.1B
F56F4.2
F56H1.5
F56H11.1C
F56H11.4
F56H9.4
F57A10.3
F57B10.11
F57B10.3B
F57B10.7
F57B7.2
F57B9.1
F57B9.2
F57B9.7B
F57C7.1B
F57C7.3B
F57F10.1B
F57F5.2
F57F5.5
F57G12.1
F57G12.2
F57H12.2
F58A3.1A
F58A3.1B
F58A4.10
F58A4.7A
F58A4.9
F58D12.1
F58D5.4B
F58D5.6
F58D5.8
F58E10.1
F58E10.3
F58G1.10
F58G11.1A
F58G11.5
F58G6.1
F58H1.5
F58H1.6
F58H12.1
F58H7.3
F59A2.5
F59A6.5
F59B10.1
F59B2.7
F59B2.8
F59B2.9
F59C12.1
F59C12.T2
F59C6.11
F59C6.8
F59E10.3
F59E12.2
F59F4.2
F59F4.4
F59F5.1
F59F5.6
F59G1.3
F59H5.1
GENENAME
H01A20.1
H02I12.2
H05C05.2A
H05G16.1
H06A10.T1
H06H21.3
H06I04.2
H06I04.3A
H06I04.4A
H06I04.6A
H06O01.1
H06O01.2
H08J11.T3
H08M01.2A
H09I01.2
H10E21.5
H11E01.1
H11E01.2
H12D21.10
H12D21.9
H12I19.1
H13N06.3A
H13N06.5
H14E04.2C
H14E04.5
H14N18.1A
H14N18.2
H16D19.4
H17B01.4A
H18N23.2B
H19N07.3
H19N07.4
H20J18.1B
H21P03.3A
H21P03.3B
H22K11.4
H24K24.4
H24O09.2
H25P06.1
H28G03.1B
H28G03.2A
H34C03.2
H35N09.2
H37A05.1
H38K22.2A
H38K22.3
H39E20.1
H39E23.1A
H39E23.1B
H42K12.2
H43I07.3
JC8.3A
JC8.8
K01A11.3
K01A2.10
K01A2.3
K01A2.8A
K01A6.1
K01A6.2
K01F9.1
K01F9.4
K01F9.5
K01G5.5
K01G5.9
K01H12.1
K02A11.1A
K02A4.1
K02A4.T1
K02A6.3A
K02B12.5
K02B2.1
K02B2.5
K02C4.2
K02D10.1B
K02D7.2
K02D7.T1
K02E10.2B
K02E10.8
K02E2.6
K02F2.3
K02F2.5
K02F3.2
K02F3.4
K02G10.1
K02G10.6A
K03A1.5
K03B4.7A
K03D10.1
K03E5.3A
K03E5.5
K03E6.3
K03E6.5
K03E6.6
K03H4.2
K04A8.6
K04B12.2A
K04B12.3
K04C2.3A
K04C2.T3
K04D7.3
K04F10.6A
K04G11.1
K04G2.4
K04G2.5
K04G7.1
K04G7.3
K04H4.1B
K05C4.3
K05C4.9
K05F1.5
K06A1.5
K06A4.4
K06H7.2
K07A1.11
K07A1.7
K07A1.8
K07A3.1A
K07A3.2
K07A9.2
K07B1.8
K07C11.10
K07C5.2
K07C5.4
K07C5.7
K07C5.9
K07D4.8
K07E12.1A
K07E3.1
K07E3.2
K07H8.10
K08A2.1
K08A2.4
K08A8.1B
K08B12.5
K08B4.1B
K08C7.3B
K08C9.7
K08D9.3
K08E3.5C
K08E3.7
K08E4.3
K08E5.2A
K08E7.2
K08E7.T1
K08F4.2
K08F4.7
K08F8.1B
K08F8.1C
K08F8.6
K08H10.3
K08H2.4
K08H2.8
K09A11.T1
K09A9.1
K09A9.2
K09A9.3
K09A9.6
K09C4.8
K09C8.5
K09C8.T1
K09E2.4A
K09E2.4B
K09E9.2
K09E9.3
K09F5.4
K10B2.1
K10B2.4
K10B3.10
K10B3.6A
K10B3.9
K10B4.6A
K10C3.3
K10C3.4
K10C3.5
K10C9.3
K10D2.5
K10D3.1
K10D3.2
K10D3.4
K10G9.2
K10H10.3A
K11B4.2
K11C4.3B
K11C4.5
K11D12.10A
K11D12.11
K11D12.2
K11D12.4
K11D12.5
K11D12.9
K11D2.4
K11D2.5
K11D9.2B
K11D9.3
K11E4.4
K11E4.T2
K11E8.1D
K11H12.2
K11H3.1A
K11H3.T2
K12C11.4
K12D12.2
K12F2.1
K12G11.6
K12H4.5
K12H6.1
K12H6.6A
LLC1.3
M01A10.3
M01B12.5A
M01D1.8
M01D7.7A
M01E10.T1
M01E11.7B
M01E5.4
M01E5.6
M01F1.3
M01G5.5
M01H9.3B
M02A10.3A
M02B1.3
M02D8.1
M02D8.3
M02D8.4A
M02E1.1B
M02F4.8
M02F4.T1
M03A1.1A
M03A8.2
M03A8.3
M03A8.4
M03B6.5
M03C11.4
M03C11.8
M03D4.4
M03F4.2B
M03F4.4
M03F4.6
M03F4.7A
M04B2.1
M04B2.4
M04C9.6A
M04C9.7
M04G12.4A
M04G12.4B
M05D6.5
M05D6.6
M106.3
M106.4A
M106.6
M110.3
M117.1
M117.2
M142.1
M142.5
M163.1
M163.3
M163.4
M163.T1
M18.2
M199.2
M4.1
M57.T1
M60.4B
M7.2
M79.1B
M79.1C
M79.2
M88.2
M88.6B
PAR2.1
R01B10.5
R01H10.3B
R01H10.8
R01H5.T1
R02D3.7
R02E12.2A
R02F11.4
R02F2.1D
R02F2.2
R03E1.1
R03E9.1
R03E9.2
R03G5.1C
R03G5.6
R04A9.2
R04A9.4
R04A9.T1
R04B5.3
R04B5.4
R04D3.T2
R04E5.9
R04F11.1
R04F11.3
R04F11.T1
R05C11.3
R05D11.7
R05D3.4
R05D3.8
R05D7.3
R05D7.6
R05F9.1A
R05F9.1B
R05F9.6
R05G6.5
R05H5.5
R06A10.2
R06A4.7
R06A4.9
R06B10.4B
R06B9.5
R06B9.6
R06C1.1
R06C1.2
R06C1.3
R06F6.1
R06F6.5B
R07B1.1
R07B5.8
R07B7.1
R07B7.10
R07C3.10
R07C3.11
R07C3.5
R07E3.4
R07E3.5
R07E4.3
R07E4.6A
R07E5.3
R07G3.7A
R08B4.1B
R08C7.10A
R08C7.2B
R09E12.3
R09G11.1
R102.1
R102.5B
R105.1
R106.1
R107.5A
R10D12.10
R10E11.1A
R10E11.8
R10E4.2A
R10H10.5
R11.T1
R119.6
R11A5.1B
R11A5.2
R11A8.8
R11D1.9
R11E3.4
R11G1.4B
R11G1.6B
R11G11.2A
R12B2.6
R12E2.16
R12H7.1
R12H7.2
R13.1
R13.4
R13A5.12
R13A5.4
R13A5.5
R13A5.7
R13G10.1
R13G10.2
R13H4.1
R13H4.3
R13H8.1C
R144.1
R144.2A
R144.4A
R144.7
R148.3B
R148.6
R151.1
R151.3
R151.9
R153.1D
R160.1B
R160.7
R166.4
R166.5A
R166.5B
R17.1
R173.2
R186.2
R31.1
R31.2
R53.6
R74.3
R74.4
R74.5A
R90.1
R90.3
R90.4
T01A4.1C
T01B7.5
T01C3.11
T01C3.7
T01C8.1A
T01C8.1C
T01D1.2A
T01E8.1
T01G1.1
T01G1.2
T01G1.3
T01G5.5
T01G9.1
T01G9.2A
T01G9.3
T01H8.5
T02D1.8
T02E1.3B
T02G5.4
T02G5.9A
T02G6.1
T02H6.6
T03D3.5
T03E6.6
T03E6.7
T03E6.T1
T03F1.1
T03F1.3
T03F1.4
T03F1.6A
T03F7.2
T03F7.7A
T03G11.1
T03G11.4
T03G6.2A
T03G6.2C
T03G6.3
T03G6.T1
T04A8.14
T04A8.5
T04B8.2
T04B8.3
T04B8.5
T04C10.1
T04C10.2A
T04C10.3
T04C10.4
T04C12.4
T04C12.5
T04C12.6
T04C12.8
T04C9.4B
T04C9.6
T04D1.3
T04D1.4
T04D3.3
T04D3.5
T04D3.T1
T04F3.4
T04F8.2
T04F8.6
T04G9.5
T05A10.1B
T05A10.1J
T05A12.2
T05A6.1
T05A6.2B
T05A7.1
T05A7.4
T05A8.4
T05B11.2
T05C1.4A
T05C1.4C
T05C12.7
T05C3.1
T05D4.1
T05E11.1
T05E11.3
T05E11.8
T05E7.1
T05E7.3
T05G5.1
T05G5.10
T05G5.3
T05H10.4
T05H10.5A
T05H10.7B
T05H4.11
T05H4.13A
T06A10.3
T06A10.4
T06C12.2
T06D8.11
T06D8.5
T06D8.6
T06D8.9
T06E6.1
T06E8.1
T06E8.2
T06F4.1A
T06G6.9
T06H11.2
T07A9.10
T07A9.11
T07A9.3
T07C12.8
T07C4.10A
T07C4.7
T07D1.2
T07D1.4
T07D10.T1
T07D3.7A
T07E3.4B
T07F10.6
T07F12.1
T07F12.2
T07H6.1A
T07H6.2
T07H6.5
T07H6.T2
T08A9.1
T08A9.T1
T08B2.3
T08B2.7B
T08B2.8
T08D10.1
T08E11.7
T08G11.1B
T08G11.2
T08H10.1
T08H4.3B
T09A12.2A
T09A12.4B
T09A12.4C
T09A5.10
T09A5.12
T09A5.13
T09A5.1A
T09A5.4
T09B4.6
T09B4.8
T09B4.T2
T09E8.1C
T09E8.1D
T10B10.2
T10B10.3
T10B10.4
T10B5.6
T10B9.T1
T10C6.10
T10C6.12
T10D4.6
T10E9.1
T10E9.3
T10G3.1
T10H10.3
T10H9.3
T11G6.4
T12A2.15A
T12A7.1
T12A7.5
T12B3.4
T12D8.1
T12D8.9
T12E12.1
T12F5.4
T12F5.5A
T12G3.6
T13C2.3B
T13C2.6A
T13C5.3
T13C5.6
T13F2.8
T13G4.4
T13H2.4A
T13H2.5
T13H5.1
T14A8.1
T14B1.1
T14F9.1
T14F9.2
T14F9.4B
T14F9.T1
T14G10.4
T14G10.5
T14G11.1
T14G11.3
T14G12.3
T15B12.T1
T15H9.1
T16A1.7
T16G1.9
T16H12.5
T18D3.9
T18D3.T1
T18H9.7A
T19A6.4
T19B10.3
T19B10.5
T19B4.7
T19C4.5
T19D2.3
T19E7.2C
T19E7.3
T19F4.1A
T20B12.6A
T20B12.9
T20B3.7
T20B5.1
T20F5.2
T20F7.1
T20G5.1
T20G5.11
T20G5.2
T21B10.2B
T21B4.4
T21B4.T1
T21B6.3
T21C12.1A
T21C12.1G
T21C12.7
T21C9.2
T21D12.4
T21G5.4
T21H3.3
T21H8.1
T21H8.5
T22A3.2
T22A3.4A
T22B2.4
T22C1.4
[truncated: 754 more rows]
