# Supplementary material for: A Widespread Distribution of Genomic CeMyoD Binding Sites Revealed and Cross Validated by ChIP-Chip and ChIP-Seq Techniques
Source: PLoS One. 2010 Dec 29;5(12):e15898. doi: 10.1371/journal.pone.0015898 (PMC3012110; doi:10.1371/journal.pone.0015898)
Supplement: Table S4 — Primer sequence information. (XLS) [file pone.0015898.s007.xls]

## Sheet: Reporter Gene Primers
PRIMER NAME	SEQUENCE
m88.5F	CTC TTCATACTCC GCTGCCTGCAG
m88.5R	C TGAGCTTGTT GCATCTGTCTAG A
unc44F	GAAGGTTTG GGTCTAATTCT GCAGC
unc44R	CATCACCTACTC GTACTCATCTAGA C
plp1F	CTGCCAT CATGTCTTCT TGCTGCAGA
plp1R	CTTGGCAGCGACGATGCTCTA GA
mig10F	CCGTTGTCCT AAGTTGACTGCAG
mig10R	CGTTGAGCTAT GAAATGTATC TAGA
emb9F	GCAACCTC ATCCGTCTTT TACTGCAG
emb9R	TACACT TTCTTATGAA CTCTTCTAGA
unc73F	CGTGTATATG TGTGTATGTA CTGCAG
unc73R	CGTAGT GTCTCAGTGCGATCTAGAG
etr1F	TTAGGCCTCTCCATTCCATTC
etr1R	CTGCAGCGTATCAGACGGCTA
ceh-20F	CTGCAGCTACATTCCTACGCATTC
Ceh-20R	AAGATCTAAATCGAGTATCTTCCA
unc-60F	CTGCAGCTCCCTCACAGTCAAT
unc-60R	AGGCCTTTGTGGTGGGGAAATAG
ric-3F	AGCTGCAGCATGCATTATTCG
ric-3R	AGGCCTGTTCAGTTTTTGGCATTT
let-60F	GACTGCAGAGAAAAAGGGGGACA
let-60R	TCTAGAGACATTCAAAGAAAAGCA
unc-112F	CTGCAGTTTTCCCATGCCTTCAAT
unc-112R	TCTAGATTGAGCCAGACTTGGACA
aqp2F	CTGCAGTGCTTGAGGGAAAAAGG
aqp2R	CTGGCACCAGTTGTCTGTGT
cey1F	AAGCTTGATCTCGGAAAGAAACGA
cey1R	TGAAAATTTGATGCCTACTTCGAA
tbx2F	CTGCAGTCACACGGCTCCTGTTG
tbx2R	CCCATTTTGTTTGTTGATTGAA
ZK867.1cF	GGACGCCAAAGACAAGAAAA
ZK867.1cR	GTGGTGGACTGTCTTGCTCA
T05A10.1cF	AGTGAAAAGATTGCGCGAGT
T05A10.1cR	GCGTGTTTGAACAACCAATG
C07A9.3bF	CTGCAGTACCGACCACTGTGTTGC
C07A9.3bR	CGCCCCTTACTACCCTTTTC
T28B11.1F	GGGCACCTGACATAGTTCATC
T28B11.1R	TTCATTCCGCGCAGATAATA
T13H2.4bF	AGTGAACCCCTGCTCAAAAA
T13H2.4bR	TGAGCTTGGGAAGTGTTGCT

## Sheet: Amplicon Primers ChiP qPCR
chip1F	TCCCGAGATTCAGCCTTAGA
chip1R	ACGCCTTCCGGAATAAGAAT
chip2F	TGGAAATGTCAAATGCCTGA
chip2R	CCGTCGAGACTTTTCCTCTG
chip3F	TTACGCAAGCTGTCCTTCCT
chip3R	TGACCTCTAAGCGGTTACGC
chip4F	GCACAACGCATTACAAATCG
chip4R	CCGTTAGCCTCCCATAACAA
chip5F	CCGCTCCCTCTCCTCTACTT
chip5R	GTCCATTGTGATTGGCACAG
chip6F	TCACAGCAACACCGTCTCTC
chip6R	GGGACGGGACTCTTTGTGTA
chip7F	AGGGTTTGGCAGATTTCCTT
chip7R	TACCGAGTAACGGCCTAACG
chip8F	CCGCATTTTCCCTTGTCTAA
chip8R	CCGTTCAGTTTTTGGCATTT
chip9F	CGCTGCTACTGCTGCTACTG
chip9R	CGTCTCACACACGCTCACTT
chip10F	AGTAAGCTCCGAGCCATGAA
chip10R	ATGGGGTGATTTTGGTGTGT
chip11F	TTGTCACCGGAATGGATTTT
chip11R	CGATCCGAAAGATCACGAAT
chip12F	GGTTCTCTCGCACACTCACA
chip12R	GTTTTCTTCGCTCGCATTTC
chip13F	CGGTAGCTTTTGCCTTCAAC
chip13R	TACACTGACCGCTGCTCATC
chip14F	TAAACTTAAAGGCGCGTGGT
chip14R	GCGCACGGATTTATTCAGAT
chip15F	TCGACTTCTCAGTGGGGTCT
chip15R	TGGCGTTTCTCTAAGTGCAG
chip16F	TCAGGTACAAAGCCCCACTT
chip16R	CGACCTCCTCGTTGTTGATT
chip17F	AATAGCGCCGAATCCCTACT
chip17R	TATCGCCAGATCCCTGTCTC
chip18F	CGTCTCAATAATCCCCTCCA
chip18R	CGTTCTGGCTTCTCGTTCTC
chip19F	TCCAGCACATCATTCAGAGC
chip19R	CAATCCATCGATTCCTCGAC
chip20F	CATGCGAAGAATGCTCTCAA
chip20R	GGGATTGCACACGTTTTTCT
chip21F	CGAGCAAAATCGAGAAAAATG
chip21R	GCCCACTTCATCTGATTGGT
chip22F	GTAGCAAGAGCCGAAAGCTG
chip22R	CTTGAAAACGGACGGCTAAC
chip23F	GTTTTGCAGTTTGCCGATTT
chip23R	CGTAGGGGATTGGAGTACTGG
chip24F	TCAGCTGTTCAAACCAAACG
chip24R	ATAACGCAAGTCGGTGCATT
chip25F	CTCGGGAAATGGAAAAACAA
chip25R	TCAATTTCGCAATACCACCA
chip26F	CCATGCACCCATAGTTGTTG
chip26R	CTATGGGAGCCAGAAGGACA
chip27F	GGATCTCTGAGCATCGGAAC
chip27R	GTCCGGGTGTTCGTTTAATG
chip28F	CGCCCTCTCATTACACCATT
chip28R	TAGGGTGCACCACATGAAGA
chip29F	GTTGTGATCTTGGGCAAAGG
chip29R	GAGTCGCTACACACCCGAAT
chip30F	GTATGTGTGCTGCAGCGTCT
chip30R	GAGGGACAGGCTAACGAGTG
chip31F	ATCGTTTGTTCGTCGTCCTC
chip31R	TCGCACTTCTCATGTTTCGT
chip32F	ATTCCCTGCTTTCCCAATTT
chip32R	GCGAGGAAATCGACAACATT
chip33F	ATTTCGTTCCCCAGTGAGTG
chip33R	GTATGACCTCGACCCGAGAA
chip34F	TCCACGAATCCAGAAAATCC
chip34R	TCCTCCGTCTTCCACGTAAC
chip35F	GTGAATGAGAGGGCTCGAAA
chip35R	TCCAGCTGCAGAACTTTTTGT
chip36F	ATGCGCCGTTAACTTTTGAC
chip36R	CCACCCAATTCAAGACTGCT
chip37F	ATTTTTGCCCTTTGATGACG
chip37R	CTAATGCAATTCCCGCCTTA
chip38F	CTGGCGCCTATCTGATTCTT
chip38R	TCAGACTGACGTGAGGCAAG
chip39F	GTGAAGGTCCGATGCTTGAT
chip39R	TGGCTGTGTTGCTATTCCAG
chip40F	GTCCCGGTTTTCGGTCTTAT
chip40R	GAAGGGAAAAGGGGAGAAAA
intest1F	GAGGTATGTTCCGCGCTAAG
intest1R	GAAAGTCACAGGCGGCTAAG
intest2F	GTTTGGTTTGCTGGAAGAGC
intest2R	CCAAGCAGTTACGACGTTCA
intest3F	GTGGCCTTCTTCTTCGTTTG
intest3R	AGTTCACGCTTGCCTTTCAT
intest4F	GAGCACTGCCGACATTTACA
intest4R	GCTGCCCTTCCTTTTCTTCT
intest5F	GGTCGAAGCCAACAATTCAT
intest5R	GCTCGGAGCAATTCTCAAAC
intest6F	CATCCCCAGCTCATTCATTT
intest6R	CCAACTTCGTTTTCGGTTGT
intest7F	GAACATAAGGGAACGGCAAA
intest7R	CTCACTTTTGCTCCCAAAGC
intest8F	TGCTGTCAATGGGAAAACAA
intest8R	CGCACATTCCCTTTAACGAT
intest9F	ACTGACGAGATGTCGGTTCC
intest9R	ATTTGGTCACCCTTGTGCTC
intest10F	GGCCGTTGTGAAAATGAAAT
intest10R	GTTTTCCAGCCACTTCCAGA
hypo1F	TTGGCTTGATGGATTGATGA
hypo1R	CAGGCAAAACCAAGGAGAAG
hypo2F	CGGATTACGGAAAGATCGAA
hypo2R	GTTGGTGAAGCTGCAGTGAA
hypo3F	GCCGTCTGATTGTCCTTGAT
hypo3R	GGCGGTTCAATTCTTCCATA
hypo4F	GCAAGTCTTTCTGGCAGGTC
hypo4R	GGACAGCGCACTGATGACTA
hypo5F	TTCAACGCAACTTTCACTCG
hypo5R	CAGATTTGTTGCGCTTTCAA
hypo6F	ATTTTTCGACGTCACCCTTG
hypo6R	AATGCCGCTAGAGACTGGAA
hypo7F	AAGCTCCGCGACTTTTTGTA
hypo7R	ATGCCACGTCACATAAAGCA
hypo8F	CCGGTTTTGTCTCTTGTGGT
hypo8R	CCACGCGAAAGCTTTTACTC
hypo9F	GCATCTGTCGCAGAATTCAA
hypo9R	GTGTATGCACCTGGACATGC
hypo10F	CTCATATGCGCGAAAATTCA
hypo10R	CACTTTGGCCACTGTTTTGA
germ1F	CGAGAACAGTGCCATCAGAA
germ1R	CGTTCCAATAGGGTTCTCCA
germ2F	AAAGGGATCCACAATGCAAC
germ2R	CACTCCAACTTTCCGTTGGT
germ3F	GAATTGAGGCATTCCGAAAA
germ3R	CAAGTCGGAAAGCACTGACA
germ4F	AAAACACGCGGAAAACAAAG
germ4R	CCTTTTGGCGTTCTTGGATA
germ5F	TGGTGCTCACGATTAACCAA
germ5R	TTCGAGTTTTCGGGTGATTC
germ6F	ATGGGTCTCACCACGAACTC
germ6R	CTGGCACATTCTCTGCAAAA
germ7F	GGACCATCTGTGTCGAACCT
germ7R	CTGCCCTAACACGGTTTGAT
germ8F	CCAGTTGTTCTCGGCTTCTC
germ8R	TGAAAAAGGGAATGGCTCAC
germ9F	TGTTGTTCTTTGGCATTGGA
germ9R	CACCATCCTCACAACCACTG
germ10F	CATTGGTGCAATACCAGTCG
germ10R	CGAGCCACCGAAAATGTACT
p1f	GGGCACTGCTGGTCTAAAAG
p1r	CCGAGAACGAGACAGTGTGA
p2f	GGTTCTCGGCAGACAGAGAC
p2r	TGAATTCCCTCCAAAACGAG
p3f	CTTATGCCCCAGCATTCAGT
p3r	TTTTTCTCGCAACCTCTCGT
p4f	CCGGATAGAAGAGCCAACTG
p4r	TACACATTTCGGCAGCGTTA
p5f	GATTGATGGCGGTTTTGATT
p5r	AACCAGGCGATAAATGCAAC
p6f	CAGGCAAAGGAGGAGAAGTG
p6r	ACGAAGGGAGTGCAATCAAC
p7f	TCAGCTGTTGTCCCTGAAGA
p7r	AAGAGGAGACGCAGAAATGC
p8f	GGGTTGGTGTCCTGACAGTT
p8r	GCAAATGCCAGAAAATTTCAA
p9f	CTGGGGTGGTCACTCATTTT
p9r	CCGCACAAAAACACATCATC
p10f	CGAGGCGACAAAGAGAAAAC
p10r	TCCTTCTGCTCCAAGTGCAT
p11f	ACCACCTCACTTTGCAATCC
p11r	GGCAGCCTCTTTTCTGACAC
p12f	GTGGCAGGAGAGCAAAAGAC
p12r	TGAAGGGCACATCAAAATGA
p13f	CTGCACACCTCTCCTCCTTC
p13r	GACGATCAATCAGGCCAAGT
p14f	ACCCGTCAGGTCATTCAAAG
p14r	CACACTGGCTGAAGAAGCAA
p15f	TGTTCCAAAGAGCACAATGC
p15r	CTTTCTGAGCCGCCTATGAG
p16f	CATGGGTCGCAGGAAATAAG
p16r	TCGTCGTCCGTCTCTTTTCT
p17f	GCGAGCATCCTTCTTGTCTC
p17r	CTCGATAAACTGGCCGAGAA
p18f	CGGCTGTTCAGATGTAAGAGG
p18r	CGATCAACTTCTTTCTTCTTTTCC
p19f	TGAGTGCGCAGTTGGTTTAC
p19r	CGGCTTCTAGCAATGAGCA
p20f	ATTTGACACGGGGTGAAAAG
p20r	GAAATGGGGCAGATGTTTGT
p21f	AACGACTGAATCGTCGAACC
p21r	CACCGCCTATGAAAGAATGG
p22f	TTCTCCGATTTCCAATACCG
p22r	GCAAAAGGTGCGAAACTAGC
p23f	CCCACTGCACAAAATCCTTC
p23r	AGCAATGTCAACCATGTGTCA
p24f	CAAAAAGCAAAAGCCTCTCAA
p24r	CGCTTTCGCAATAGTCATCA
p25f	TTCATCGCAGGCTTCTTTTT
p25r	TATTCCGGCGTTGAAACAAT
p26f	TCATGTCCGTGGAATCAGAA
p26r	TCATTGTTGCCACTGATCAAA
p27f	GCCCTTCCTTTTCTCTCGTT
p27r	CACCACCAAGTCGTCTCAAA
p28f	CATCGCAGTTGGCATCTCTA
p28r	TTACATTTCTCCGGCGACTC
p29f	TCAATCCATTTCCCGTGTTT
p29r	GTCGTACGGCGAGAGAGAAG
p30f	ACCGTGTCTTTCGTTTCTCG
p30r	TCGTTGCCAATTCATCTTCA
p31f	ACCAGATCCAATTGGCTGAC
p31r	GCAGACGGTTCGACACTACA
p32f	ACGCATTTCATGATCCAACC
p32r	TGAAGGTTCCGAAGAATCCA
p33f	CAAAAATTGGGAACTTGAGCA
p33r	TTTTCCCTTTTCCTGTGTGG
p34f	TGACTCGTGAGCATTTCTGG
p34r	TCATCGACCCACTTTCTGA
p35f	AATCCCCCGAGTTGGTAATC
p35r	TTTCGTTGAATGCAGGAAAAT
p36f	ACATCTGGTTGGAAGGGATG
p36r	TCGGTCTTTTGATTCGCTTT
p37f	ATGTCGGAAGACGAGGAAGA
p37r	CACTTCTTGCAGTCGGCATA
p38f	TCCGCCCGTCATAAATCTAC
p38r	AGAGCAGGAGGAACACGAAA
p39f	ATAGCTGAAAGTCGGCGAAA
p39r	GAAGCCTTCCTCACATCGAC
p40f	CTTGAGTGACAATCCGCACA
p40r	GAGGCAAACATTGAAAATGC
